# Supplementary material for: Hypothermic Oxygenated Machine Perfusion (HOPE) Prior to Liver Transplantation Mitigates Post-Reperfusion Syndrome and Perioperative Electrolyte Shifts
Source: MDPI journal article supplement (doi:10.3390/jcm11247381), 2022-12-12
Supplement: s1 [file s1]

## Supplementary Materials

**Table S1: Description of liver transplant recipients' comorbidities defined as relevant for further statistical evaluation.**

| Relevant recipient comorbidities at date of liver transplantation |                                                                                                                                                                |
|-------------------------------------------------------------------|----------------------------------------------------------------------------------------------------------------------------------------------------------------|
| <b>Cardiovascular</b>                                             | Arterial Hypertension<br>Arterial Fibrillation<br>Coronary Artery Disease<br>Cardiomyopathy<br>Cerebral Vascular Disease<br>Arrhythmias<br>Heart Valve Disease |
| <b>Respiratory</b>                                                | Asthma bronchiale<br>Nicotine Abuse $\geq 25$ py                                                                                                               |
| <b>Renal</b>                                                      | Chronic Renal Insufficiency (KDIGO CKD stages $\geq 3$ )                                                                                                       |
| <b>Endocrine / Metabolic</b>                                      | Diabetes mellitus<br>Obesity (BMI $> 30$ )<br>Cachexia (BMI $< 17$ )<br>Adrenal Insufficiency<br>Hypothyreoidism<br>Grave's Disease<br>Dyslipidemia            |
| <b>Gastrointestinal</b>                                           | Infectious Bowel Disease<br>Chronic Pancreatitis                                                                                                               |
| <b>Neurological</b>                                               | Epilepsy<br>Multiple Sclerosis<br>Polyneuropathy                                                                                                               |
| <b>Hematopoietic</b>                                              | Bone Marrow Deficiency<br>Hereditary Coagulopathy                                                                                                              |
| <b>Other</b>                                                      | Rheumatism<br>Sarcoidosis<br>IVDU                                                                                                                              |

BMI: Body Mass Index; CKD: Chronic Kidney Disease; IVDU: intravenous drug use; KDIGO: "Kidney; Disease: Improving Global Outcomes"; py: pack years.

**Table S2: Description of liver transplant recipients' transplant indications, previously defined as "Other".**

| Indications for transplant defined as "Other" at date of liver transplantation | All, N (%) | Liver Graft Preservation Techniques |              | p-Value (HOPE vs. SCS) |
|--------------------------------------------------------------------------------|------------|-------------------------------------|--------------|------------------------|
|                                                                                |            | -SCS- N (%)                         | -HOPE- N (%) |                        |
| <b>Other</b>                                                                   |            |                                     |              | 0.99                   |
| Sarcoidosis                                                                    | 1 (1.0%)   | 0 (0%)                              | 1 (2.0%)     |                        |
| ITBL                                                                           | 5 (5.0%)   | 3 (6.0%)                            | 2 (4.0%)     |                        |
| Chronic Graft Failure                                                          | 1 (1.0%)   | 0 (0%)                              | 1 (2.0%)     |                        |
| Recurrent Cholangiosepsis                                                      | 2 (2.0%)   | 0 (0%)                              | 2 (4.0%)     |                        |
| α-1-antitrypsin Deficiency                                                     | 1 (1.0%)   | 0 (0%)                              | 1 (2.0%)     |                        |
| Acute Graft Failure                                                            | 1 (1.0%)   | 0 (0%)                              | 1 (2.0%)     |                        |
| Post-Kasai Cirrhosis                                                           | 2 (2.0%)   | 1 (2.0%)                            | 1 (2.0%)     |                        |
| Porphyria                                                                      | 1 (1.0%)   | 0 (0%)                              | 1 (2.0%)     |                        |
| SSC                                                                            | 1 (1.0%)   | 0 (0%)                              | 1 (2.0%)     |                        |
| ADPKD                                                                          | 1 (1.0%)   | 1 (2.0%)                            | 0 (0%)       |                        |
| IPBN                                                                           | 1 (1.0%)   | 1 (2.0%)                            | 0 (0%)       |                        |
| Wilson's Disease                                                               | 1 (1.0%)   | 1 (2.0%)                            | 0 (0%)       |                        |
| Budd-Chiari Syndrome                                                           | 1 (1.0%)   | 1 (2.0%)                            | 0 (0%)       |                        |
| PNF                                                                            | 2 (2.0%)   | 2 (4.0%)                            | 0 (0%)       |                        |
| <b>Total</b>                                                                   | 21 (21.0%) | 10 (10.0%)                          | 11 (11.0%)   |                        |

ADPKD: autosomal dominant polycystic kidney disease; HOPE: Hypothermic Organ Perfusion; IPBN: Intraductal Papillary Neoplasm of the Bile Duct; ITBL: Ischemic Type Biliary Lesion; PNF: Primary Non-Function; SCS: Static Cold Storage; SSC: Secondary Sclerosing Cholangitis.
